# Supplementary material for: Immune Responses to SARS-CoV-2 Infection and Vaccination in Dialysis Patients and Kidney Transplant Recipients
Source: MDPI journal article supplement (doi:10.3390/microorganisms10010004), 2021-12-21
Supplement: s1 [file s1]

## Supplementary Material

### Immune Responses to SARS-CoV-2 Infection and Vaccination in Dialysis Patients and Kidney Transplant Recipients

Patrick Affeldt <sup>1#</sup>, Felix C. Koehler <sup>1,2#</sup>, Karl August Brensing <sup>3</sup>, Vivien Adam <sup>1</sup>, Julia Burian <sup>4</sup>, Linus Butt <sup>1,2</sup>, Martin Gies <sup>5</sup>, Franziska Grundmann <sup>1</sup>, Steffen Hinrichs <sup>1</sup>, Wibke Johannis <sup>6</sup>, Nils Kalisch <sup>1</sup>, Matthias Meyer-Delpho <sup>7</sup>, Simon Oehm <sup>1</sup>, Eva Platen <sup>8</sup>, Claudia Schöler <sup>5</sup>, Eva Heger <sup>9</sup>, Gertrud Steger <sup>9</sup>, Dirk Stippel <sup>10</sup>, Aileen Ziegelhoefer <sup>9</sup>, Thomas Benzing <sup>1,2</sup>, Florian Klein <sup>9</sup>, Christine Kurschat <sup>1,2</sup>, Roman-Ulrich Müller <sup>1,2\*</sup>, Veronica Di Cristanziano<sup>9,\*</sup>

<sup>1</sup> Department II of Internal Medicine and Center for Molecular Medicine Cologne, University of Cologne, Faculty of Medicine and University Hospital Cologne, 50937 Cologne, Germany

<sup>2</sup> CECAD, University of Cologne, Faculty of Medicine and University Hospital of Cologne, 50931 Cologne, Germany

<sup>3</sup> Nierenzentrum Bonn, 53175 Bonn, Germany

<sup>4</sup> Nieren- und Dialysezentrum Rheinbach, 53359 Rheinbach, Germany

<sup>5</sup> KfH-Nierenzentrum Köln-Longerich, 50737 Cologne, Germany

<sup>6</sup> Institute for Clinical Chemistry, Faculty of Medicine and University Hospital Cologne, University of Cologne, 50937 Cologne, Germany

<sup>7</sup> Dialysezentrum Siegburg, 53721 Siegburg, Germany

<sup>8</sup> Nierenzentrum Eifel, 53894 Mechernich, 53879 Euskirchen, 53937 Schleiden, Germany

<sup>9</sup> Institute of Virology, Faculty of Medicine and University Hospital Cologne, 50935 Cologne, Germany

<sup>10</sup> Department of General, Visceral, Cancer and Transplant Surgery, Faculty of Medicine, University Hospital Cologne, University of Cologne, 50937 Cologne, Germany.

# Contributed equally.

**\* Corresponding authors**

Roman-Ulrich Müller, MD

Department II of Internal Medicine and Center for Molecular Medicine Cologne, University of Cologne, Faculty of Medicine and University Hospital Cologne; Cologne, 50937, Germany

Tel.: +49 221 478 30966; E-mail: [roman-ulrich.mueller@uk-koeln.de](mailto:roman-ulrich.mueller@uk-koeln.de)

Veronica Di Cristanziano, MD

Institute of Virology, Faculty of Medicine and University Hospital Cologne, Cologne, Germany

Tel.: +49 221 478 85828; E-mail: [veronica.di-cristanziano@uk-koeln.de](mailto:veronica.di-cristanziano@uk-koeln.de)

| Baseline characteristics                  | BNT162b2 vaccinated dialysis patients, n=475 | mRNA-1273 vaccinated dialysis patients, n=138 | p-value          |
|-------------------------------------------|----------------------------------------------|-----------------------------------------------|------------------|
| <b>Age, yrs (± SD)</b>                    | 70 (± 14)                                    | 61 (± 16)                                     | <b>&lt;0.001</b> |
| <b>Sex, n (%)</b>                         |                                              |                                               |                  |
| Female                                    | 182 (38.3)                                   | 51 (37.0)                                     | 0.772            |
| <b>Pre-existing kidney disease, n (%)</b> |                                              |                                               |                  |
| Glomerulonephritis                        | 85 (17.9)                                    | 27 (19.6)                                     | 0.655            |
| Diabetic nephropathy                      | 68 (14.3)                                    | 35 (25.4)                                     | <b>0.002</b>     |
| Hypertensive nephropathy                  | 118 (24.8)                                   | 33 (23.9)                                     | 0.824            |
| ADPKD                                     | 31 (6.5)                                     | 11 (8.0)                                      | 0.554            |
| Other genetic nephropathy                 | 62 (13.1)                                    | 10 (7.2)                                      | 0.062            |
| Unknown / other                           | 111 (23.4)                                   | 22 (15.9)                                     | 0.062            |
| <b>Haemodialysis, n (%)</b>               | 449 (94.5)                                   | 138 (100.0)                                   |                  |
| Years of Haemodialysis (IQR)              | 4 (2-6)                                      | 4 (1-8)                                       | 0.387            |
| <b>CAPD, n (%)</b>                        | 26 (5.5)                                     | 0                                             | <b>0.005</b>     |
| Years of CAPD (IQR)                       | 2 (1-4)                                      | 0                                             | n. a.            |

**Supplemental Table S1a: Baseline characteristics of SARS-CoV-2 naïve dialysis patients vaccinated with BNT162b2 or mRNA-1273.**

Abbreviations: ADPKD: Autosomal Dominant Polycystic Kidney Disease; CAPD: Continuous Ambulatory Peritoneal Dialysis; IQR: Interquartile

Range; n. a.: not applicable; SARS-CoV-2: Severe Acute Respiratory Syndrome Coronavirus Type 2; SD: Standard Deviation; yrs: Years.

|                   | Sum of squares | Df  | F      | p-value          |
|-------------------|----------------|-----|--------|------------------|
| <b>Regression</b> | 450259224.4    | 3   | 19.770 | <b>&lt;0.001</b> |
| <b>Residual</b>   | 4198147851     | 553 |        |                  |
| <b>Total</b>      | 4648407075     | 556 |        |                  |

| Coefficients                          | Standard Error | t      | p-value      |
|---------------------------------------|----------------|--------|--------------|
| Vaccine used                          | 281.992        | 3.248  | <b>0.001</b> |
| Assay used                            | 220.439        | -1.379 | 0.169        |
| Time between sampling and vaccination | 6.194          | 0.973  | 0.331        |

**Supplemental Table S1b: Differences in SARS-COV2 IgG in SARS-COV2 naïve dialysis patients vaccinated with BNT162b2 or mRNA-1273 adjusted for used Immunoassay (RBD vs. S1) and time between sampling and vaccination by a linear multiple regression model (corrected  $R^2=0,092$ )** Two vaccinations with mRNA-1273 are correlated with higher SARS-COV2 IgG compared to two vaccinations with BNT162b2

| Baseline characteristics           | mRNA-vaccinated dialysis patients,<br>n=613 | Convalescent dialysis patients receiving<br>a BNT162b2 booster shot, n=38 | p-value      |
|------------------------------------|---------------------------------------------|---------------------------------------------------------------------------|--------------|
| Age, yrs ( $\pm$ SD)               | 68 ( $\pm$ 15)                              | 69 ( $\pm$ 16)                                                            | 0.526        |
| Sex, n (%)                         |                                             |                                                                           |              |
| Female                             | 233 (38.0)                                  | 18 (47.4)                                                                 | 0.197        |
| Pre-existing kidney disease, n (%) |                                             |                                                                           |              |
| Glomerulonephritis                 | 112 (18.3)                                  | 3 (7.9)                                                                   | 0.104        |
| Diabetic nephropathy               | 103 (16.8)                                  | 8 (21.1)                                                                  | 0.499        |
| Hypertensive nephropathy           | 151 (24.6)                                  | 10 (26.3)                                                                 | 0.816        |
| ADPKD                              | 42 (6.8)                                    | 6 (15.8)                                                                  | <b>0.041</b> |
| Other genetic nephropathy          | 72 (11.7)                                   | 4 (10.5)                                                                  | 0.820        |
| Unknown / other                    | 140 (22.8)                                  | 7 (18.4)                                                                  | 0.527        |
| Haemodialysis, n (%)               | 587 (95.8)                                  | 37 (97.4)                                                                 | 0.629        |
| Years of Haemodialysis (IQR)       | 4 (2-6)                                     | 3 (2-6)                                                                   | 0.693        |
| CAPD, n (%)                        | 26 (4.2)                                    | 1                                                                         | 0.629        |
| Years of CAPD (IQR)                | 2 (1-4)                                     | 13                                                                        | 0.444        |

**Supplemental Table S2a: Baseline characteristics of SARS-CoV-2 naïve dialysis patients vaccinated with BNT162b2 or mRNA-1273 compared to COVID-19 convalescent dialysis patients receiving a BNT162b2 booster shot.** Abbreviations: ADPKD: Autosomal Dominant Polycystic Kidney Disease; CAPD: Continuous Ambulatory Peritoneal Dialysis; IQR: Interquartile Range; SARS-CoV-2: Severe Acute Respiratory Syndrome Coronavirus Type 2; SD: Standard Deviation; yrs: Years.

|                   | Sum of squares | Df  | F      | p-value          |
|-------------------|----------------|-----|--------|------------------|
| <b>Regression</b> | 671958428.9    | 3   | 28.647 | <b>&lt;0.001</b> |
| <b>Residual</b>   | 4917378248     | 585 |        |                  |
| <b>Total</b>      | 5589336677     | 588 |        |                  |

| Coefficients                          | Standard Error | t     | p-value           |
|---------------------------------------|----------------|-------|-------------------|
| Booster vs. 2 mRNA vaccinations       | 525.822        | 4.749 | <b>&lt; 0.001</b> |
| Assay used                            | 242.729        | 1.692 | <b>0.091</b>      |
| Time between sampling and vaccination | 6.268          | 1.563 | 0.119             |

**Supplemental Table S2b: Differences in SARS-COV2 IgG SARS-CoV-2 naïve dialysis patients vaccinated with BNT162b2 or mRNA-1273 compared to COVID-19 convalescent dialysis patients receiving a BNT162b2 booster shot after adjusting for used assay (RBD vs. S1) and time between sampling and vaccination in days by a linear multiple regression model (corrected  $R^2=0,116$ )** *Receiving a single Booster Vaccination with BNT162b2 after infection is associated with higher SARS-COV2 IgG compared to receiving two mRNA vaccinations in dialysis patients adjusted for used Assays und time between sampling and vaccination*

| Anti-RBD (BAU/ml),<br>median (IQR), n=29 | Anti-S1 (BAU/ml),<br>median (IQR), n=29 | Spearman Correlation<br>Coefficient | p-value |
|------------------------------------------|-----------------------------------------|-------------------------------------|---------|
| 390.0 (793.0)                            | 493.5 (875.7)                           | 0.99                                | <0.0001 |

**Supplemental Table S3a: Correlation between SARS-COV2 IgG measured by S1-Antigen and RBD Immunoassay in 29 dialysis patients 30 days after vaccination with BNT162b2 (BioNTech / Pfizer).** Anti-SARS-CoV-2 immunoglobulin G (IgG) targeting the spike (S) protein were detected by the semiquantitative Euroimmun anti-SARS-CoV-2 IgG ELISA on the Euroimmun Analyzer I (Euroimmun Diagnostik, Lübeck, Germany) and the quantitative IDK® anti-SARS-CoV-2 IgG ELISA (Immundiagnostik AG, Bensheim, Germany) on the DYNEX DSX® (Dynex Technologies, Chantilly, VA, USA), both using the recombinant S1 antigen of the spike protein, and the chemiluminescent microparticle immunoassays by Abbott for the quantitative detection of anti-spike RBD (receptor binding domain) IgG (SARS-CoV-2 IgG II Quant) on the automated system Alinity i (Abbott, Abbott Park, IL, United States). Quantitative IgG values were measured in BAU (binding antibody unit/ml).

| N<br>29 | Mann-Whitney-U-<br>Test | Z      | Sig. (2-<br>tailed) |
|---------|-------------------------|--------|---------------------|
| BAU/ml  | 392.00                  | -0.433 | 0.658               |

**Supplemental Table S3b: Comparisons of mean SARS-COV2 IgGs measured by S1-Antigen and RBD Immunoassay in 29 dialysis patients 30 days after vaccination with BNT162b2 (BioNTech / Pfizer).** Anti-SARS-CoV-2 immunoglobulin G (IgG) targeting the spike (S) protein were detected by the semiquantitative Euroimmun anti-SARS-CoV-2 IgG ELISA on the Euroimmun Analyzer I (Euroimmun Diagnostik, Lübeck, Germany) and the quantitative IDK® anti-SARS-CoV-2 IgG ELISA (Immundiagnostik AG, Bensheim, Germany) on the DYNEX DSX® (Dynex Technologies, Chantilly, VA, USA), both using the recombinant S1 antigen of the spike protein, and the chemiluminescent microparticle immunoassays by Abbott for the quantitative detection of anti-spike RBD (receptor binding domain) IgG (SARS-CoV-2 IgG II Quant) on the automated system Alinity i (Abbott, Abbott Park, IL, United States). Quantitative IgG values were measured in BAU (binding antibody unit/ml). Sig.: Significance

| Spearman Correlation |         |
|----------------------|---------|
| Coefficient          | p-value |
| 0.265                | 0.05    |

**Supplemental Table S4a: Correlation of timespan between transplantation and vaccination in years and SARS-COV-2 IgG: *Years after transplantation and SARS-COV2 IgG are barely positive correlated***



|                   | <b>Sum of squares</b> | <b>Df</b> | <b>F</b> | <b>p-value</b> |
|-------------------|-----------------------|-----------|----------|----------------|
| <b>Regression</b> | 1767049.688           | 4         | 4.180    | <b>0.004</b>   |
| <b>Residual</b>   | 8667150.479           | 82        |          |                |
| <b>Total</b>      | 10434200.167          | 86        |          |                |

| <b>Coefficients</b>                   | <b>Standard Error</b> | <b>t</b> | <b>p-value</b> |
|---------------------------------------|-----------------------|----------|----------------|
| Assay used                            | 68.481                | 2,089    | <b>0.04</b>    |
| MPA / MMF                             | 79.968                | -2.433   | <b>0.017</b>   |
| Age (yrs)                             | 2.005                 | 0.011    | <b>0.992</b>   |
| Time between sampling and vaccination | 1.536                 | 0.732    | 0.466          |

**Supplemental Table S4b: Linear regression model of lacking seroconversion and immunosuppressive regimens with Mycophenolate Mofetil / Mycophenolic Acid adjusted for assay used, age and time between sampling in days and vaccination.**

Abbreviations: MMF: Mycophenolate Mofetil; MPA: Mycophenolic Acid; yrs: Years. *MPA/MMF therapy is negatively correlated with SARS-COV2 IgG after two BNT162b2 vaccination adjusted for Age, time between sampling and vaccination and assay used*

| <b>Baseline characteristics</b>       | <b>Kidney transplant recipients, n=32</b> |
|---------------------------------------|-------------------------------------------|
| <b>Age, yrs (<math>\pm</math> SD)</b> | 55 ( $\pm$ 13)                            |
| <b>Sex, n</b>                         |                                           |
| Female                                | 11                                        |
| Male                                  | 22                                        |
| <b>Immunosuppression, n</b>           |                                           |
| Tacrolimus                            | 32                                        |
| Cyclosporin A                         | 0                                         |
| Belatacept                            | 0                                         |
| mTOR                                  | 0                                         |
| Azathioprine                          | 1                                         |
| MMF / MPA                             | 27                                        |
| Steroid                               | 30                                        |
| <b>Underlying kidney disease, n</b>   |                                           |
| Glomerulonephritis                    | 10                                        |
| Diabetic nephropathy                  | 1                                         |
| Hypertensive nephropathy              | 2                                         |
| ADPKD                                 | 10                                        |
| Other genetic nephropathy             | 2                                         |
| Unknown / other                       | 7                                         |
| <b>Kidney transplantation mode, n</b> |                                           |
| Deceased                              | 9                                         |
| Living donor                          | 23                                        |
| Living donor AB0i                     | 5                                         |
| <b>Vaccine used, n</b>                |                                           |
| BNT162b2 (BionTech / Pfizer)          | 29                                        |
| mRNA-1273 (Moderna)                   | 3                                         |

**Supplemental Table S5: Baseline characteristics of SARS-CoV-2 naive kidney transplant recipients with prospectively monitored for vaccine-induced humoral and cellular immunity.** Abbreviations: ADPKD: Autosomal Dominant Polycystic Kidney Disease; IQR: Interquartile Range; MMF: Mycophenolate Mofetil; MPA: Mycophenolic Acid; mTOR: mechanistic Target Of Rapamycin; SD: Standard Deviation; yrs: Years.

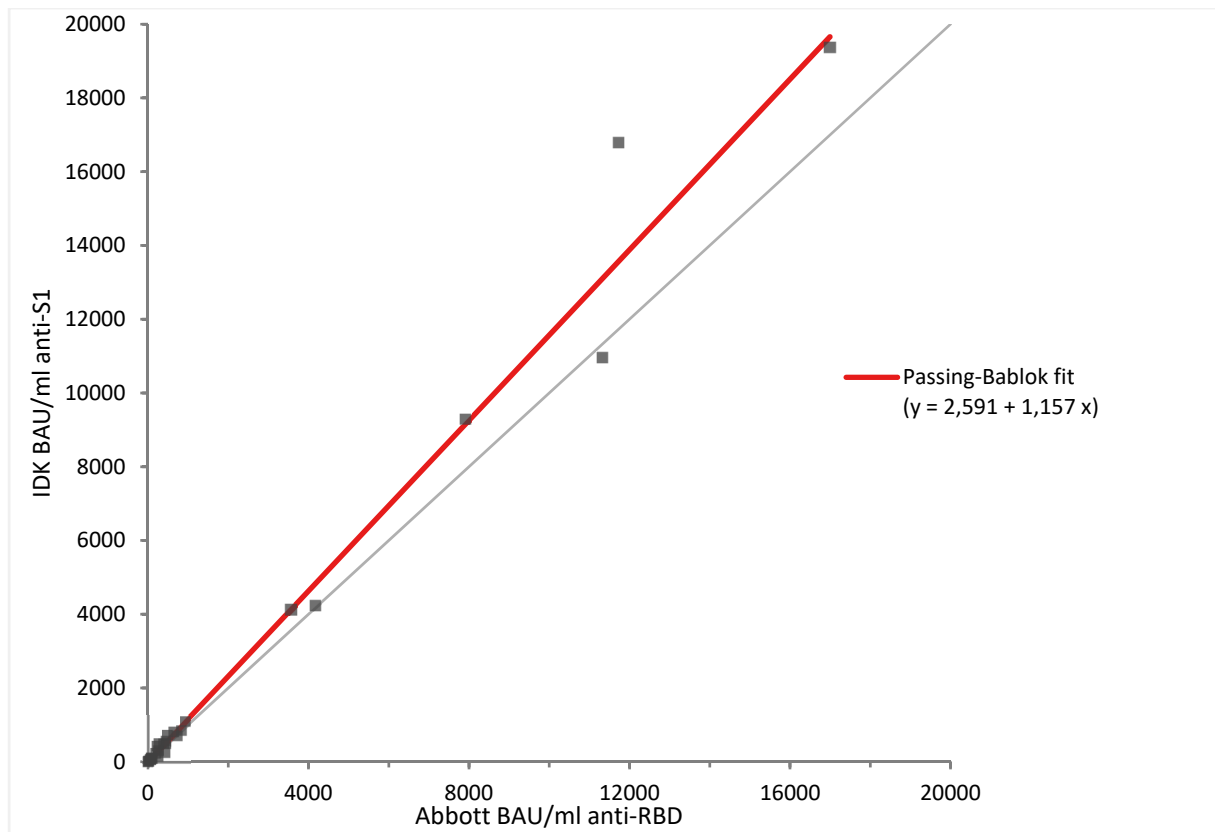

**Supplemental Figure S1: Passing-Bablok-Regression for SARS-COV2 IgG Assays targeting targeting S1 or RBD: Intercept 2,6 (95%-CI: -10,7 to 14,7); Slope 1,16 (95%-CI: 1,0 to 1,3).**

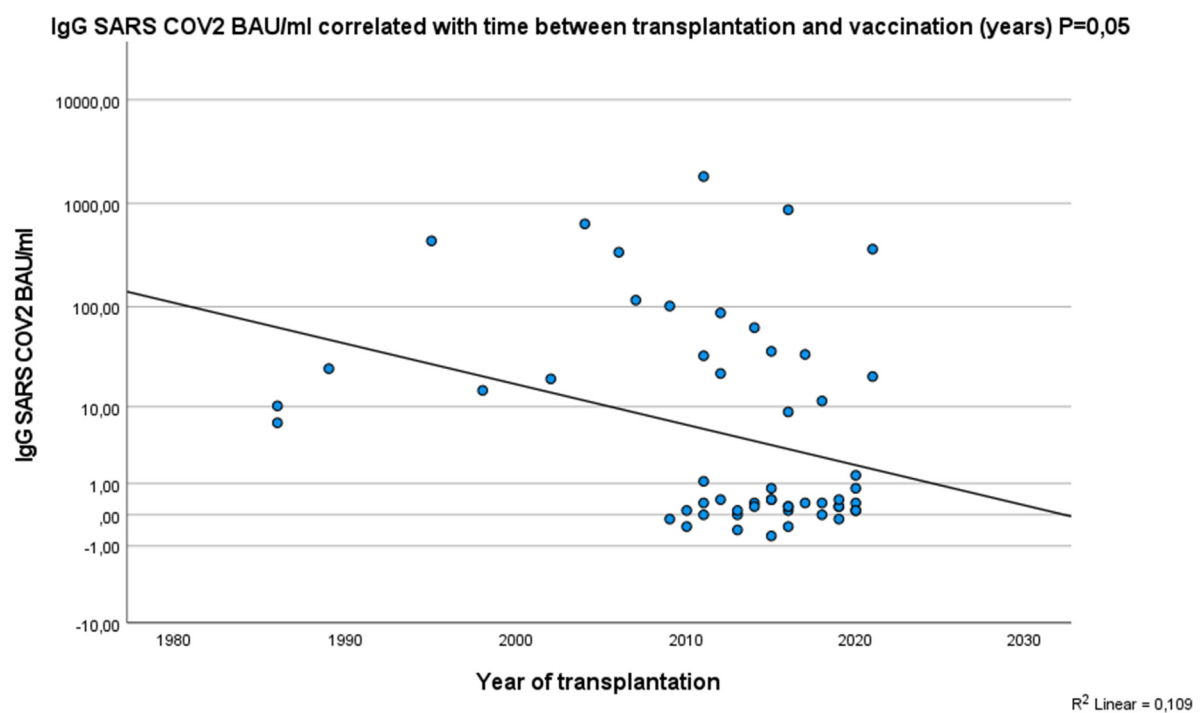

**Supplemental Figure S2: IgG SARS COV2 BAU/ml correlated with time between transplantation and vaccination: X: logarithmic representation of IgG levels in BAU/ml  
Y: Year of Transplantation**
